# Supplementary material for: Quantitative analysis of metabolic fluxes in brown fat and skeletal muscle during thermogenesis
Source: Springer Nature journal article supplement (doi:10.1038/s42255-023-00825-8), 2023-06-19
Supplement: 42255_2023_825_MOESM1_ESM.pdf [file 42255_2023_825_MOESM1_ESM.pdf]

## Reporting Summary

Nature Portfolio wishes to improve the reproducibility of the work that we publish. This form provides structure for consistency and transparency in reporting. For further information on Nature Portfolio policies, see our [Editorial Policies](#) and the [Editorial Policy Checklist](#).

### Statistics

For all statistical analyses, confirm that the following items are present in the figure legend, table legend, main text, or Methods section.

- | n/a                                 | Confirmed                                                                                                                                                                                                                                                                                      |
|-------------------------------------|------------------------------------------------------------------------------------------------------------------------------------------------------------------------------------------------------------------------------------------------------------------------------------------------|
| <input type="checkbox"/>            | <input checked="" type="checkbox"/> The exact sample size ( $n$ ) for each experimental group/condition, given as a discrete number and unit of measurement                                                                                                                                    |
| <input type="checkbox"/>            | <input checked="" type="checkbox"/> A statement on whether measurements were taken from distinct samples or whether the same sample was measured repeatedly                                                                                                                                    |
| <input type="checkbox"/>            | <input checked="" type="checkbox"/> The statistical test(s) used AND whether they are one- or two-sided<br><i>Only common tests should be described solely by name; describe more complex techniques in the Methods section.</i>                                                               |
| <input type="checkbox"/>            | <input checked="" type="checkbox"/> A description of all covariates tested                                                                                                                                                                                                                     |
| <input type="checkbox"/>            | <input checked="" type="checkbox"/> A description of any assumptions or corrections, such as tests of normality and adjustment for multiple comparisons                                                                                                                                        |
| <input type="checkbox"/>            | <input checked="" type="checkbox"/> A full description of the statistical parameters including central tendency (e.g. means) or other basic estimates (e.g. regression coefficient) AND variation (e.g. standard deviation) or associated estimates of uncertainty (e.g. confidence intervals) |
| <input type="checkbox"/>            | <input checked="" type="checkbox"/> For null hypothesis testing, the test statistic (e.g. $F$ , $t$ , $r$ ) with confidence intervals, effect sizes, degrees of freedom and $P$ value noted<br><i>Give <math>P</math> values as exact values whenever suitable.</i>                            |
| <input checked="" type="checkbox"/> | <input type="checkbox"/> For Bayesian analysis, information on the choice of priors and Markov chain Monte Carlo settings                                                                                                                                                                      |
| <input checked="" type="checkbox"/> | <input type="checkbox"/> For hierarchical and complex designs, identification of the appropriate level for tests and full reporting of outcomes                                                                                                                                                |
| <input checked="" type="checkbox"/> | <input type="checkbox"/> Estimates of effect sizes (e.g. Cohen's $d$ , Pearson's $r$ ), indicating how they were calculated                                                                                                                                                                    |

*Our web collection on [statistics for biologists](#) contains articles on many of the points above.*

### Software and code

Policy information about [availability of computer code](#)

Data collection Agilent Wave, Agilent MassHunter Acquisition, Visualsonics Vevo Lab, Zeiss Zen Blue, and Applied Biosystems StepOne Software were used for Seahorse, GCMS, Doppler, Histology, and qPCR data acquisition respectively.

Data analysis Agilent MassHunter Quantitative Analysis was used for GCMS data analysis. EI-MAVEN and Compound Discoverer was used for LCMS data analysis. GraphPad Prism was used for graphs and statistical analysis. Code is available: [https://github.com/johnnl15/Bootstrapping\\_AUC\\_NitrogenFL\\_BATLiverSerum](https://github.com/johnnl15/Bootstrapping_AUC_NitrogenFL_BATLiverSerum)

For manuscripts utilizing custom algorithms or software that are central to the research but not yet described in published literature, software must be made available to editors and reviewers. We strongly encourage code deposition in a community repository (e.g. GitHub). See the Nature Portfolio [guidelines for submitting code & software](#) for further information.

### Data

Policy information about [availability of data](#)

All manuscripts must include a [data availability statement](#). This statement should provide the following information, where applicable:

- Accession codes, unique identifiers, or web links for publicly available datasets
- A description of any restrictions on data availability
- For clinical datasets or third party data, please ensure that the statement adheres to our [policy](#)

All data in the main and extended figures is available.

## Human research participants

Policy information about [studies involving human research participants and Sex and Gender in Research](#).

|                             |                                  |
|-----------------------------|----------------------------------|
| Reporting on sex and gender | <input type="text" value="N/A"/> |
| Population characteristics  | <input type="text" value="N/A"/> |
| Recruitment                 | <input type="text" value="N/A"/> |
| Ethics oversight            | <input type="text" value="N/A"/> |

Note that full information on the approval of the study protocol must also be provided in the manuscript.

## Field-specific reporting

Please select the one below that is the best fit for your research. If you are not sure, read the appropriate sections before making your selection.

Life sciences       Behavioural & social sciences       Ecological, evolutionary & environmental sciences

For a reference copy of the document with all sections, see [nature.com/documents/nr-reporting-summary-flat.pdf](https://www.nature.com/documents/nr-reporting-summary-flat.pdf)

## Life sciences study design

All studies must disclose on these points even when the disclosure is negative.

|                 |                                                                                                                                                                                                                                                                                                                                                                    |
|-----------------|--------------------------------------------------------------------------------------------------------------------------------------------------------------------------------------------------------------------------------------------------------------------------------------------------------------------------------------------------------------------|
| Sample size     | Arteriovenous sampling experiments used a sample size of 14-20 due to the high amount of variation. For all other animal experiments a sample size of 4-7 was used. For cell experiments a sample size of 3-6 was used due to smaller biological variation, except in the case of the seahorse where a samples size of 15 was used due to the assay's sensitivity. |
| Data exclusions | In the doppler studies, mice were excluded if heart rate dropped below 400 beat per minute.                                                                                                                                                                                                                                                                        |
| Replication     | All experimental findings were replicated at least 3 times.                                                                                                                                                                                                                                                                                                        |
| Randomization   | Samples and mice were randomly assigned experimental conditions.                                                                                                                                                                                                                                                                                                   |
| Blinding        | Mouse dissections were not blinded as the phenotypes are different enough that the different temperature conditions can be identified. However, all sample processing was blinded.                                                                                                                                                                                 |

## Reporting for specific materials, systems and methods

We require information from authors about some types of materials, experimental systems and methods used in many studies. Here, indicate whether each material, system or method listed is relevant to your study. If you are not sure if a list item applies to your research, read the appropriate section before selecting a response.

### Materials & experimental systems

|                                     |                                                                 |
|-------------------------------------|-----------------------------------------------------------------|
| n/a                                 | Involvement in the study                                        |
| <input type="checkbox"/>            | <input checked="" type="checkbox"/> Antibodies                  |
| <input type="checkbox"/>            | <input checked="" type="checkbox"/> Eukaryotic cell lines       |
| <input checked="" type="checkbox"/> | <input type="checkbox"/> Palaeontology and archaeology          |
| <input type="checkbox"/>            | <input checked="" type="checkbox"/> Animals and other organisms |
| <input checked="" type="checkbox"/> | <input type="checkbox"/> Clinical data                          |
| <input checked="" type="checkbox"/> | <input type="checkbox"/> Dual use research of concern           |

### Methods

|                                     |                                                 |
|-------------------------------------|-------------------------------------------------|
| n/a                                 | Involvement in the study                        |
| <input checked="" type="checkbox"/> | <input type="checkbox"/> ChIP-seq               |
| <input checked="" type="checkbox"/> | <input type="checkbox"/> Flow cytometry         |
| <input checked="" type="checkbox"/> | <input type="checkbox"/> MRI-based neuroimaging |

## Antibodies

|                 |                                                                                                                                                                                                    |
|-----------------|----------------------------------------------------------------------------------------------------------------------------------------------------------------------------------------------------|
| Antibodies used | GS (BD#610517), UCP1 (CST#14670 for tissue and Abcam#ab10983 for cells), VINC (SantaCruz#sc-73614), GLS (ProteinTech#12855), GLUD1 (ProteinTech#14299), FASN (CST#3180), PPAR $\gamma$ (CST#2443). |
| Validation      | All antibodies have been validated by manufacturer or by knockdown/knockout studies.                                                                                                               |

## Eukaryotic cell lines

Policy information about [cell lines and Sex and Gender in Research](#)

|                                                                   |                                                                                                                                                                   |
|-------------------------------------------------------------------|-------------------------------------------------------------------------------------------------------------------------------------------------------------------|
| Cell line source(s)                                               | Brown preadipocytes were isolated from C57BL/6J neonates at postnatal day 1 and immortalized with pBabe-SV40 Large T. The sex of each neonate was not determined. |
| Authentication                                                    | Cell lines were authenticated to be BAT cell lines by differentiating them and confirming the presence of BAT markers by qPCR.                                    |
| Mycoplasma contamination                                          | Cell line tested negative for mycoplasma.                                                                                                                         |
| Commonly misidentified lines (See <a href="#">ICLAC</a> register) | No commonly misidentified cell lines were used in the study.                                                                                                      |

## Animals and other research organisms

Policy information about [studies involving animals; ARRIVE guidelines](#) recommended for reporting animal research, and [Sex and Gender in Research](#)

|                         |                                                                                                      |
|-------------------------|------------------------------------------------------------------------------------------------------|
| Laboratory animals      | C57BL/6J, Male, 10-12 weeks of age,                                                                  |
| Wild animals            | No wild animals were used in this study.                                                             |
| Reporting on sex        | All experiments were done in male mice. We plan to followup with female mice in the future.          |
| Field-collected samples | No field-collected samples were used in this study.                                                  |
| Ethics oversight        | UMass Chan Medical School IACUC approved all animal experiments (Protocol #'s: 202100035, 202200006) |

Note that full information on the approval of the study protocol must also be provided in the manuscript.
